# Supplementary material
Source: publisher site journal article supplement (https://www.dovepress.com/article/370615)
Supplement: Supplementary file 1 [file get_supplementary_file.php]

Supplementary Figures and Legends:

Supplementary Figure 1

Figure 1A

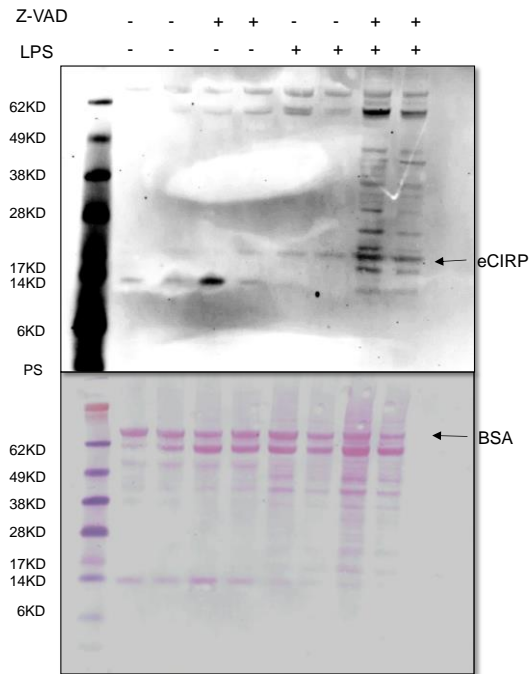

Figure 1C

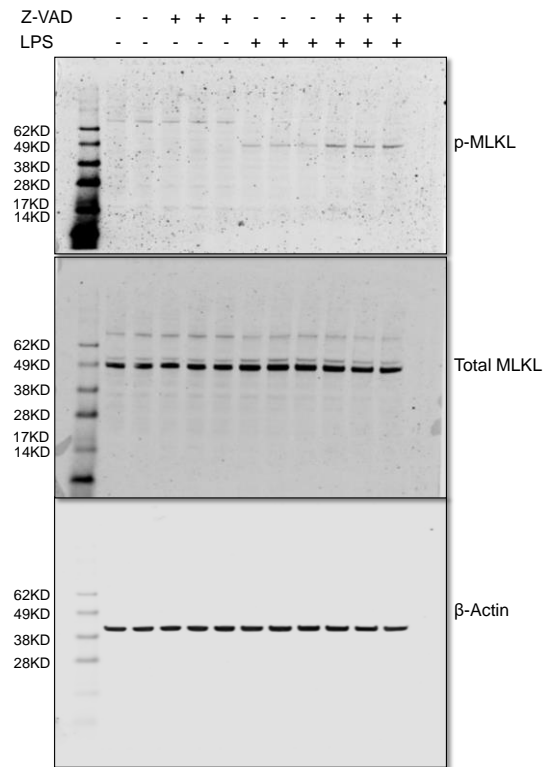

Supplementary Figure 1: Full gel blots of original Figure 1A, and 1C.

**Supplementary Figure 2**

**Figure 2A**

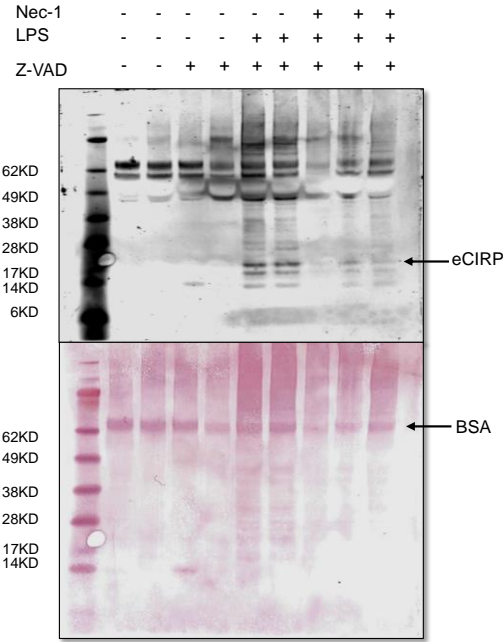

**Figure 2C**

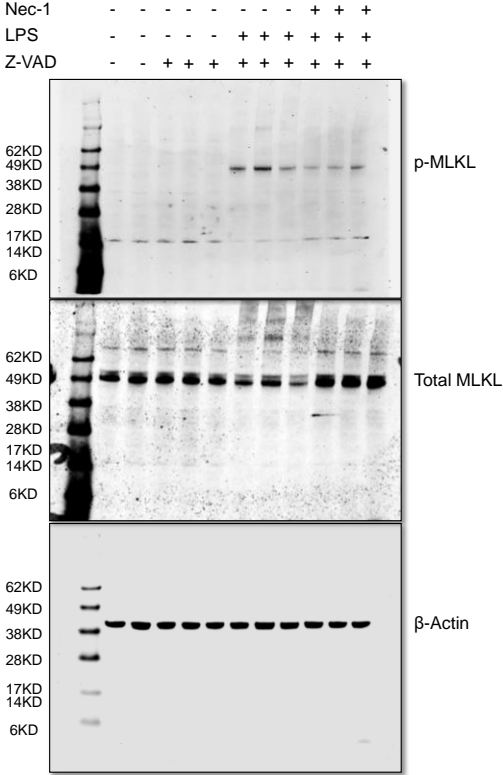

**Supplementary Figure 2: Full gel blots of original Figure 2A, and 2C.**
